# Supplementary material
Source: PubMed Central journal article supplement (PMC7453340)
Supplement: jamaotolaryngolheadnecksurg-e202286-s002.pdf [file jamaotolaryngolheadnecksurg-e202286-s002.pdf]

## Supplementary Online Content

Zwolan TA, Kallogjeri D, Firszt JB, Buchman CA. Assessment of cochlear implants for adult Medicare beneficiaries aged 65 years or older who meet expanded indications of open-set sentence recognition: a multicenter nonrandomized clinical trial. *JAMA Otolaryngol Head Neck Surg*. Published online August 27, 2020.  
doi:10.1001/jamaoto.2020.2286

**eFigure.** Comparison of Change in Each of the Speech Perception Outcome Measures at Study Visits Between the Two Study Groups

**eTable.** Estimated Marginal Means at Each Study Visit and the Comparison With Baseline

This supplementary material has been provided by the authors to give readers additional information about their work.

**eFigure.** Comparison of Change in Each of the Speech Perception Outcome Measures at Study Visits Between the Two Study Groups

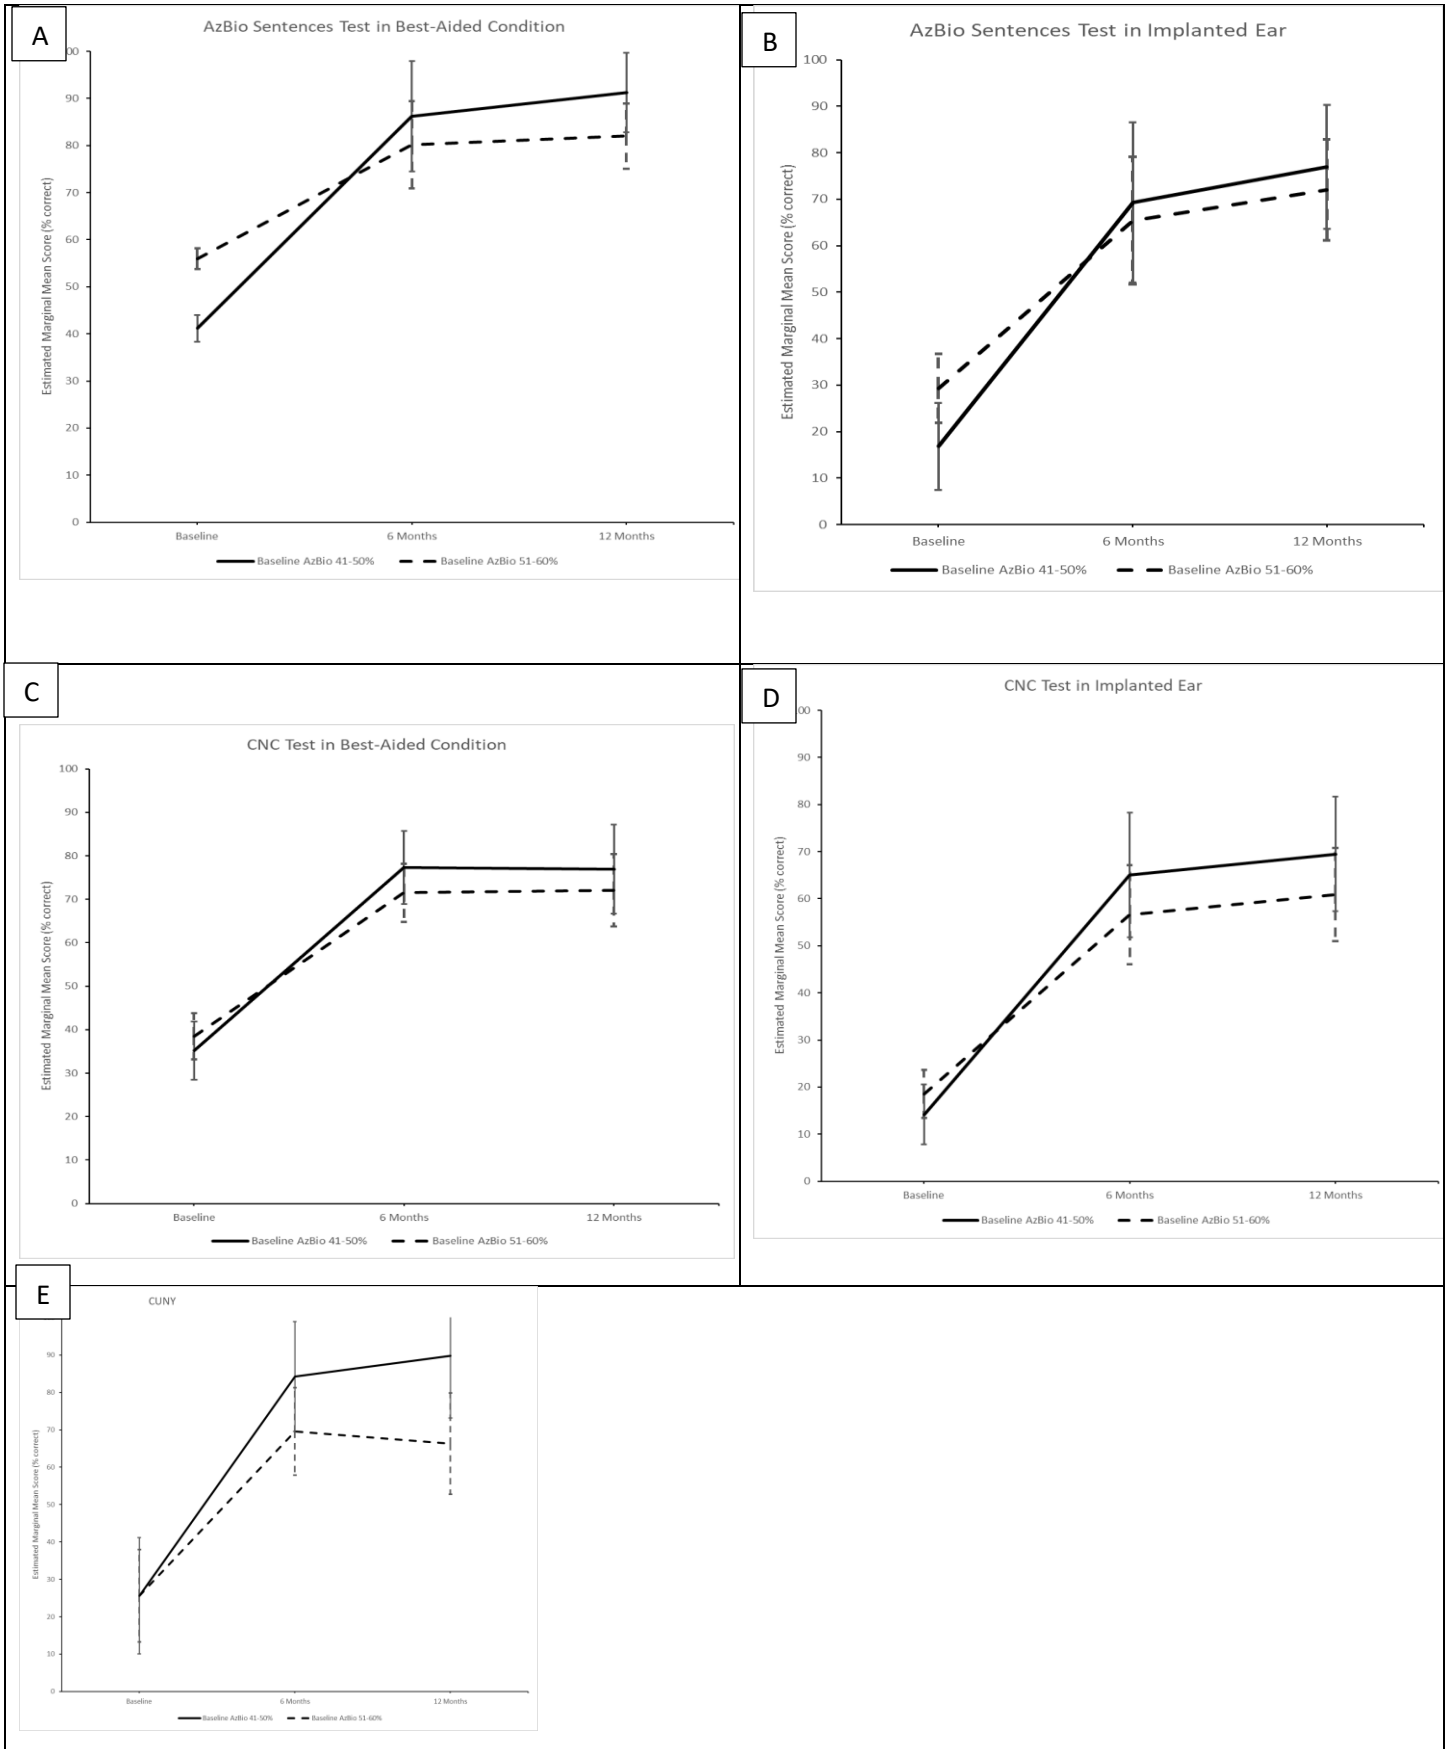

**eTable.** Estimated Marginal Means at Each Study Visit and the Comparison With Baseline

| Measure Domains | Baseline Estimated Marginal Mean (95% CI) | 6-Months Postoperatively Estimated Marginal Mean (95% CI) | 12-Months Postoperatively Estimated Marginal Mean (95% CI) | Change 6 Month-Baseline Estimated Marginal Mean Difference (95% CI) | Change 12 Month-Baseline Estimated Marginal Mean Difference (95% CI) |
|-----------------|-------------------------------------------|-----------------------------------------------------------|------------------------------------------------------------|---------------------------------------------------------------------|----------------------------------------------------------------------|
| HUI3            |                                           |                                                           |                                                            |                                                                     |                                                                      |
| Vision          | 0.958 (0.951-0.965)                       | 0.959 (0.952-0.966)                                       | 0.948 (0.931-0.966)                                        | 0.0008 (-0.0071 to 0.0087)                                          | -0.0098 (-0.0263 to 0.0067)                                          |
| Hearing         | 0.526 (0.476-0.576)                       | 0.712 (0.667-0.768)                                       | 0.709 (0.657-0.761)                                        | 0.1916 (0.1294 to 0.2538)                                           | 0.1828 (0.1193 to 0.2462)                                            |
| Speech          | 0.903 (0.849-0.957)                       | 0.941 (0.899-0.984)                                       | 0.927 (0.877-0.977)                                        | 0.0381 (-0.0211 to 0.0972)                                          | 0.0236 (-0.0400 to 0.0872)                                           |
| Ambulation      | 0.924 (0.881-0.969)                       | 0.898 (0.841-0.956)                                       | 0.903 (0.852-0.953)                                        | -0.0261 (-0.0731 to 0.0208)                                         | -0.0217 (-0.0675 to 0.0240)                                          |
| Dexterity       | 0.996 (0.967-1.025)                       | 0.947 (0.918-0.977)                                       | 0.985 (0.955-1.015)                                        | -0.0487 (-0.0869 to -0.0105)                                        | -0.0111 (-0.0501 to 0.0278)                                          |
| Emotion         | 0.929 (0.876-0.982)                       | 0.923 (0.871-0.976)                                       | 0.950 (0.918-0.982)                                        | -0.0058 (-0.0515 to 0.0399)                                         | 0.0211 (-0.0186 to 0.0609)                                           |
| Cognition       | 0.971 (0.938-1.004)                       | 0.938 (0.875-1.002)                                       | 0.960 (0.909-1.011)                                        | -0.0326 (-0.0944 to 0.0293)                                         | -0.0109 (-0.0574 to 0.0357)                                          |
| Pain            | 0.895 (0.853-0.937)                       | 0.866 (0.789-0.943)                                       | 0.928 (0.897-0.958)                                        | -0.0290 (-0.0823 to 0.0242)                                         | 0.0327 (0.0014 to 0.0639)                                            |
| Multi           | 0.558 (0.502-0.614)                       | 0.610 (0.526-0.694)                                       | 0.653 (0.589-0.717)                                        | 0.0521 (-0.0163 to 0.1206)                                          | 0.0954 (0.0425 to 0.1482)                                            |
| APHAB           |                                           |                                                           |                                                            |                                                                     |                                                                      |
| Global          | 19.29 (12.05-26.52)                       | 49.56 (38.74-60.39)                                       | 51.38 (41.02-61.74)                                        | 30.28 (19.34 to 41.22)                                              | 32.09 (21.49 to 42.70)                                               |
| Ease            | 26.09 (14.08-38.11)                       | 61.80 (48.71-74.89)                                       | 57.67 (44.33-71.00)                                        | 35.71 (22.41 to 49.00)                                              | 31.57 (18.90 to 44.25)                                               |
| Reverb          | 14.30 (8.07-20.53)                        | 47.01 (35.26-58.76)                                       | 50.79 (41.60-59.98)                                        | 32.71 919.78 to 45.64)                                              | 36.48 (26.03 to 46.93)                                               |
| BGnoise         | 16.00 (8.08-23.92)                        | 53.15 (42.27-64.03)                                       | 51.42 (42.09-60.75)                                        | 37.15 (26.70 to 47.60)                                              | 35.42 (26.57 to 44.26)                                               |
| Averse          | -24.21 (-31.65 -16.77)                    | -29.63 (-39.95 -19.31)                                    | -31.87 (-40.43 -23.31)                                     | -5.42 (-13.64 to 2.80)                                              | -7.66 (-16.63 to 1.31)                                               |

| SF36                                 |                     |                     |                     |                         |                         |
|--------------------------------------|---------------------|---------------------|---------------------|-------------------------|-------------------------|
| Physical Function                    | 72.10 (63.07-81.13) | 68.02 (58.04-78.00) | 66.98 (55.83-78.12) | -4.07 (-8.79 to 0.64)   | -5.12 (-11.25 to 1.01)  |
| Limitations due to physical function | 71.77 (57.23-86.32) | 58.06 (41.94-74.19) | 61.85 (45.65-78.05) | -13.71 (-29.39 to 1.97) | -9.93 (-24.72 to 4.86)  |
| Limitations due to emotion           | 82.80 (69.83-95.76) | 79.57 (65.93-93.21) | 80.66 (69.03-92.29) | -3.23 (-20.04 to 13.58) | -2.14 (-17.83 to 13.55) |
| Fatigue                              | 67.90 (62.74-73.06) | 67.26 (60.13-74.39) | 64.55 (57.91-71.19) | -0.65 (-6.90 to 5.61)   | -3.35 (-9.08 to 2.37)   |
| Emotional                            | 82.06 (76.5-87.63)  | 82.71 (77.18-88.24) | 83.51 (78.73-88.30) | 0.65 (-4.55 to 5.84)    | 1.45 (-2.39 to 5.30)    |
| Social                               | 84.68 (76.76-92.59) | 86.69 (79.80-93.59) | 88.99 (82.19-95.78) | 2.02 (-7.97 to 12.00)   | 4.31 (-4.85 to 13.47)   |
| Pain                                 | 77.42 (70.78-84.06) | 70.56 (61.20-79.93) | 76.50 (69.07-83.93) | -6.85 (-14.51 to 0.80)  | -0.92 (-8.36 to 6.52)   |
| General Health                       | 74.03 (68.60-79.46) | 72.06 (66.01-78.10) | 71.75 (65.37-78.12) | -1.98 (-7.23 to 3.28)   | -2.28 (-7.80 to 3.23)   |
